# Supplementary material
Source: publisher figshare collection journal article supplement (https://acs.figshare.com/ndownloader/files/5117653)
Supplement: Supplementary file 1 [file 5117653]

data_publication_text
_publ_requested_journal          J.Am.Chem.Soc.
_publ_contact_author_name        'Professor Bo B. Iversen'
_publ_contact_author_address     
;University of Aarhus
Department of Chemistry
Laboratory of Inorganic Chemistry
Langelandsgade 140
DK-8000 Aarhus C
Denmark
;
_publ_contact_author_email       bo@chem.au.dk
_publ_contact_author_phone       +4589423969
_publ_contact_author_fax         '+458619 6199'
loop_
_publ_author_name
_publ_author_address
'Iversen, B. B.'
;University of Aarhus
Department of Chemistry
Laboratory of Inorganic Chemistry
Langelandsgade 140
DK-8000 Aarhus C
Denmark
;
'Poulsen, R. D.'
;University of Aarhus
Department of Chemistry
Laboratory of Inorganic Chemistry
Langelandsgade 140
DK-8000 Aarhus C
Denmark
;
'Bentien, A.'
;University of Aarhus
Department of Chemistry
Laboratory of Inorganic Chemistry
Langelandsgade 140
DK-8000 Aarhus C
Denmark
;
'Chevalier, M.'
;University of Aarhus
Department of Chemistry
Laboratory of Inorganic Chemistry
Langelandsgade 140
DK-8000 Aarhus C
Denmark
;


_publ_requested_category         FA

_publ_contact_letter             
;
Please consider this CIF submission for publication in J.Am.Chem.Soc
I certify that all authors have seen and approved of this submission, 
that all have made significant scientific contributions to the work reported, 
and that all share responsibility and accountability for the results.


Prof. Bo B. Iversen
;


_publ_section_title              
;
Synthesis, Physical Properties, Multi-Temperature Crystal Structures
and 20 K Synchrotron X-ray Charge Density of a New Magnetic
Metal Organic Framework Struckture
Mn~3~[C~8~O~4~H~4~]~3~(C~5~H~11~ON)~2~
;

_publ_section_abstract           
;  

;
_publ_section_comment            
;

;

data_final125k

_audit_creation_method           SHELXL-97
_chemical_name_systematic        ?
_chemical_name_common            MnDEF
_chemical_melting_point          ?
_chemical_formula_moiety         'C34 H34 Mn3 N2 O14'
_chemical_formula_sum            'C34 H34 Mn3 N2 O14'
_chemical_formula_weight         859.45

loop_
_atom_type_symbol
_atom_type_description
_atom_type_scat_dispersion_real
_atom_type_scat_dispersion_imag
_atom_type_scat_source
C C 0.0033 0.0016 'International Tables Vol C Tables 4.2.6.8 and 6.1.1.4'
H H 0.0000 0.0000 'International Tables Vol C Tables 4.2.6.8 and 6.1.1.4'
N N 0.0061 0.0033 'International Tables Vol C Tables 4.2.6.8 and 6.1.1.4'
O O 0.0106 0.0060 'International Tables Vol C Tables 4.2.6.8 and 6.1.1.4'
Mn Mn 0.3368 0.7283 'International Tables Vol C Tables 4.2.6.8 and 6.1.1.4'

_symmetry_cell_setting           monoclinic
_symmetry_space_group_name_H-M   'I 2/a'
_symmetry_int_tables_number      15
_symmetry_space_group_name_Hall  '-I 2ya'
 
loop_ 
 _symmetry_equiv_pos_as_xyz 
 'x, y, z' 
 '-x+1/2, y, -z' 
 'x+1/2, y+1/2, z+1/2' 
 '-x+1, y+1/2, -z+1/2' 
 '-x, -y, -z' 
 'x-1/2, -y, z' 
 '-x+1/2, -y+1/2, -z+1/2' 
 'x, -y+1/2, z+1/2' 
 
_cell_length_a                    19.0378(4) 
_cell_length_b                    10.6843(2) 
_cell_length_c                    17.3365(4) 
_cell_angle_alpha                 90.00 
_cell_angle_beta                  94.3320(10) 
_cell_angle_gamma                 90.00 
_cell_volume                      3516.27(13) 
_cell_formula_units_Z             4 
_cell_measurement_temperature     125 
_cell_measurement_reflns_used     8109
_cell_measurement_theta_min       2.146 
_cell_measurement_theta_max       38.21
 
_exptl_crystal_description       trapezshaped
_exptl_crystal_colour            'clear light colourless'
_exptl_crystal_size_max          0.500
_exptl_crystal_size_mid          0.300
_exptl_crystal_size_min          0.175
_exptl_crystal_size_rad          0.184
_exptl_crystal_density_meas       ? 
_exptl_crystal_density_diffrn     1.623 
_exptl_crystal_density_method     'not measured' 
_exptl_crystal_F_000              1756 
_exptl_absorpt_coefficient_mu     1.134 
_exptl_absorpt_correction_type   multi-scan
_exptl_absorpt_correction_T_min   0.893655
_exptl_absorpt_correction_T_max  1.000000
_exptl_absorpt_process_details   '(SADABS; Sheldrick, 1997)'

 
_exptl_special_details 
; 
The absorbtion correction was done with sadabs,
mu*r. The radius was calculated from the estimation of the crystal
being a sphere (r = 0.18 mm). 
The mu coefficient is calculated from the program FPrime (Program 
FPrime for Windows 1.0 for calculating real and anomalous x-ray
dispersion coefficients, R.B. Von Dreele, 1994). 

The data collection nominally covered over a full sphere
of reciprocal space, by a combination of sets of \w scans and
\p scan. No sign of crystal decay was observed.  
; 
 
_diffrn_ambient_temperature      125
_diffrn_radiation_probe          x-ray
_diffrn_radiation_type           MoK\a
_diffrn_radiation_wavelength     0.71073
_diffrn_source                   'sealed X-ray tube'
_diffrn_source_type              'SMART 1k'
_diffrn_radiation_monochromator  graphite
_diffrn_measurement_device_type  'Bruker SMART 1K CCD area-detector'
_diffrn_measurement_method       '\w and \p'
_diffrn_detector_area_resol_mean ?
_diffrn_reflns_number             8020 
_diffrn_reflns_av_R_equivalents   0.0000 
_diffrn_reflns_av_sigmaI/netI     0.0326 
_diffrn_reflns_limit_h_min        -33 
_diffrn_reflns_limit_h_max        31 
_diffrn_reflns_limit_k_min        0 
_diffrn_reflns_limit_k_max        18 
_diffrn_reflns_limit_l_min        0 
_diffrn_reflns_limit_l_max        30 
_diffrn_reflns_theta_min          2.24 
_diffrn_reflns_theta_max          38.84 
_reflns_number_total              8020 
_reflns_number_gt                 5912 
_reflns_threshold_expression      >2sigma(I) 
 
_computing_data_collection       'SMART (Bruker, 1998)'
_computing_cell_refinement       'SMART (Bruker, 1998)'
_computing_data_reduction        SAINT
_computing_structure_solution    'SHELXS-97 (Sheldrick, 1990)'
_computing_structure_refinement  'SHELXL-97 (Sheldrick, 1997)'
_computing_molecular_graphics    'SHELXL-97 (Sheldrick, 1997)'
_computing_publication_material  SHELXL97
 
_refine_special_details 
; 
 Refinement of F^2^ against ALL reflections.  The weighted R-factor wR and 
 goodness of fit S are based on F^2^, conventional R-factors R are based 
 on F, with F set to zero for negative F^2^. The threshold expression of 
 F^2^ > 2sigma(F^2^) is used only for calculating R-factors(gt) etc. and is 
 not relevant to the choice of reflections for refinement.  R-factors based 
 on F^2^ are statistically about twice as large as those based on F, and R- 
 factors based on ALL data will be even larger. 

The last Alert level A and the Alert level C in the CHECKCIF routine:
PLAT220_ALERT_2_A Large Non-Solvent    C 
    Ueq(max)/Ueq(min) ...       4.80 Ratio 
PLAT222_ALERT_3_C Large Non-Solvent    H 
    Ueq(max)/Ueq(min) ...       4.00 Ratio 

is indeed a Ueq(max) of a C/H atom of the DEF solvent molecule
in the structure.
; 
 
_refine_ls_structure_factor_coef  Fsqd  
_refine_ls_matrix_type            full 
_refine_ls_weighting_scheme       calc  
_refine_ls_weighting_details 
 'calc w=1/[\s^2^(Fo^2^)+(0.0744P)^2^+21.7095P] where P=(Fo^2^+2Fc^2^)/3' 
_atom_sites_solution_primary      direct 
_atom_sites_solution_secondary    difmap 
_atom_sites_solution_hydrogens    geom 
_refine_ls_hydrogen_treatment      constr
_refine_ls_extinction_method      none 
_refine_ls_extinction_coef        ? 
_refine_ls_number_reflns          8020 
_refine_ls_number_parameters      250 
_refine_ls_number_restraints      1 
_refine_ls_R_factor_all           0.0926 
_refine_ls_R_factor_gt            0.0508 
_refine_ls_wR_factor_ref          0.2044 
_refine_ls_wR_factor_gt           0.1281 
_refine_ls_goodness_of_fit_ref    1.201 
_refine_ls_restrained_S_all       1.200 
_refine_ls_shift/su_max           0.004 
_refine_ls_shift/su_mean          0.000 
 
loop_ 
 _atom_site_label 
 _atom_site_type_symbol 
 _atom_site_fract_x 
 _atom_site_fract_y 
 _atom_site_fract_z 
 _atom_site_U_iso_or_equiv 
 _atom_site_adp_type 
 _atom_site_occupancy 
 _atom_site_symmetry_multiplicity 
 _atom_site_calc_flag 
 _atom_site_refinement_flags 
 _atom_site_disorder_assembly 
 _atom_site_disorder_group 
Mn1 Mn 0.2500 0.53139(6) 0.5000 0.01415(12) Uani 1 2 d S . . 
Mn2 Mn 0.42573(2) 0.43092(4) 0.53506(2) 0.01542(10) Uani 1 1 d . . . 
O1 O 0.46140(11) 0.5569(2) 0.43744(12) 0.0197(4) Uani 1 1 d . . . 
O2 O 0.34846(11) 0.5192(2) 0.43479(11) 0.0189(4) Uani 1 1 d . A . 
O8 O 0.29725(12) 0.6603(2) 0.58110(12) 0.0221(4) Uani 1 1 d . A . 
O9 O 0.40812(12) 0.5905(3) 0.60020(14) 0.0273(5) Uani 1 1 d . A . 
O11 O 0.30065(12) 0.3793(2) 0.56582(12) 0.0224(4) Uani 1 1 d . A . 
O12 O 0.39660(13) 0.3126(3) 0.63087(15) 0.0336(6) Uani 1 1 d . A . 
C1 C 0.40010(14) 0.5677(3) 0.40436(14) 0.0154(4) Uani 1 1 d . . . 
C2 C 0.38955(15) 0.6349(3) 0.32871(15) 0.0188(5) Uani 1 1 d . A . 
C3 C 0.44300(16) 0.7099(3) 0.30368(17) 0.0225(5) Uani 1 1 d . . . 
H3 H 0.4860 0.7152 0.3327 0.027 Uiso 1 1 calc R A . 
C4 C 0.43200(17) 0.7228(3) 0.73508(18) 0.0249(6) Uani 1 1 d . . . 
H4 H 0.4670 0.6699 0.7195 0.030 Uiso 1 1 calc R . . 
C5 C 0.36922(15) 0.7343(3) 0.68985(16) 0.0190(5) Uani 1 1 d . A . 
C6 C 0.31688(17) 0.8122(3) 0.71358(17) 0.0247(6) Uani 1 1 d . . . 
H6 H 0.2751 0.8219 0.6827 0.030 Uiso 1 1 calc R . . 
C7 C 0.32664(17) 0.6237(3) 0.28371(18) 0.0255(6) Uani 1 1 d . . . 
H7 H 0.2908 0.5734 0.3002 0.031 Uiso 1 1 calc R A . 
C8 C 0.35703(15) 0.6563(3) 0.61735(16) 0.0199(5) Uani 1 1 d . . . 
C11 C 0.33130(16) 0.3286(3) 0.62472(17) 0.0213(5) Uani 1 1 d . . . 
C12 C 0.28905(15) 0.2865(3) 0.68925(16) 0.0192(5) Uani 1 1 d . A . 
C13 C 0.21716(16) 0.3093(3) 0.68597(18) 0.0254(6) Uani 1 1 d . . . 
H13 H 0.1950 0.3487 0.6429 0.030 Uiso 1 1 calc R A . 
C14 C 0.32192(16) 0.2263(4) 0.75321(19) 0.0269(6) Uani 1 1 d . . . 
H14 H 0.3700 0.2100 0.7553 0.032 Uiso 1 1 calc R A . 
O21 O 0.43115(19) 0.2695(3) 0.46173(19) 0.0272(6) Uani 0.910(4) 1 d P A 1 
N21 N 0.3909(3) 0.0886(4) 0.4066(3) 0.0529(11) Uani 1 1 d . A 1 
C21 C 0.3863(2) 0.1845(4) 0.4541(2) 0.0352(9) Uani 0.910(4) 1 d P A 1 
H21 H 0.3476 0.1887 0.4836 0.042 Uiso 1 1 calc R A 1 
C22 C 0.4494(3) 0.0807(5) 0.3553(3) 0.0560(13) Uani 1 1 d . A 1 
H22A H 0.4638 0.1650 0.3430 0.067 Uiso 1 1 calc R A 1 
H22B H 0.4320 0.0411 0.3072 0.067 Uiso 1 1 calc R A 1 
C23 C 0.5121(4) 0.0108(7) 0.3876(4) 0.0718(18) Uani 1 1 d . A 1 
H23A H 0.5341 0.0560 0.4308 0.108 Uiso 1 1 calc R A 1 
H23B H 0.5449 0.0016 0.3486 0.108 Uiso 1 1 calc R A 1 
H23C H 0.4980 -0.0704 0.4044 0.108 Uiso 1 1 calc R A 1 
C24 C 0.3330(4) -0.0045(6) 0.3995(4) 0.074(2) Uani 1 1 d . A 1 
H24A H 0.2889 0.0380 0.4068 0.089 Uiso 1 1 calc R A 1 
H24B H 0.3298 -0.0382 0.3474 0.089 Uiso 1 1 calc R A 1 
C25 C 0.3409(4) -0.1081(6) 0.4541(4) 0.0680(17) Uani 1 1 d . A 1 
H25A H 0.3862 -0.1464 0.4506 0.102 Uiso 1 1 calc R A 1 
H25B H 0.3046 -0.1688 0.4420 0.102 Uiso 1 1 calc R A 1 
H25C H 0.3373 -0.0773 0.5056 0.102 Uiso 1 1 calc R A 1 
C31 C 0.451(3) 0.212(4) 0.420(3) 0.0352(9) Uani 0.090(4) 1 d P A 3 
O31 O 0.428(2) 0.251(4) 0.484(2) 0.0272(6) Uani 0.090(4) 1 d P A 3 
 
loop_ 
 _atom_site_aniso_label 
 _atom_site_aniso_U_11 
 _atom_site_aniso_U_22 
 _atom_site_aniso_U_33 
 _atom_site_aniso_U_23 
 _atom_site_aniso_U_13 
 _atom_site_aniso_U_12 
Mn1 0.0126(2) 0.0193(2) 0.0106(2) 0.000 0.00087(17) 0.000 
Mn2 0.01367(18) 0.01977(19) 0.01311(16) 0.00247(13) 0.00295(13) -0.00033(13) 
O1 0.0145(8) 0.0274(10) 0.0175(8) 0.0063(7) 0.0025(7) 0.0010(7) 
O2 0.0173(8) 0.0250(10) 0.0150(7) 0.0031(7) 0.0046(7) -0.0021(7) 
O8 0.0214(10) 0.0273(10) 0.0168(8) -0.0076(8) -0.0027(7) 0.0001(8) 
O9 0.0171(9) 0.0386(13) 0.0259(10) -0.0155(10) -0.0002(8) 0.0010(9) 
O11 0.0234(10) 0.0277(10) 0.0162(8) 0.0076(8) 0.0032(7) 0.0005(8) 
O12 0.0192(10) 0.0509(16) 0.0315(12) 0.0215(11) 0.0083(9) 0.0019(10) 
C1 0.0163(11) 0.0198(11) 0.0100(8) 0.0013(8) 0.0009(8) 0.0011(8) 
C2 0.0195(11) 0.0224(12) 0.0148(10) 0.0051(9) 0.0032(9) 0.0007(9) 
C3 0.0174(12) 0.0296(14) 0.0196(11) 0.0088(10) -0.0045(10) -0.0030(10) 
C4 0.0208(13) 0.0310(15) 0.0227(12) -0.0105(11) 0.0010(10) 0.0031(11) 
C5 0.0196(12) 0.0214(12) 0.0160(10) -0.0056(9) 0.0021(9) -0.0025(9) 
C6 0.0206(13) 0.0337(16) 0.0191(11) -0.0095(11) -0.0031(10) 0.0045(11) 
C7 0.0225(13) 0.0343(16) 0.0196(11) 0.0110(11) -0.0005(10) -0.0068(12) 
C8 0.0212(12) 0.0229(12) 0.0158(10) -0.0043(9) 0.0033(9) -0.0014(10) 
C11 0.0201(12) 0.0239(13) 0.0209(11) 0.0067(10) 0.0070(10) 0.0001(10) 
C12 0.0164(11) 0.0250(13) 0.0167(10) 0.0066(9) 0.0042(9) -0.0001(9) 
C13 0.0186(12) 0.0378(17) 0.0200(12) 0.0138(11) 0.0027(10) 0.0016(11) 
C14 0.0146(11) 0.0411(18) 0.0254(13) 0.0154(13) 0.0039(10) 0.0037(11) 
O21 0.0318(13) 0.0179(13) 0.0325(16) -0.0037(11) 0.0072(13) -0.0067(10) 
N21 0.077(3) 0.0353(19) 0.047(2) -0.0099(16) 0.005(2) -0.024(2) 
C21 0.041(2) 0.0332(19) 0.0319(18) -0.0020(15) 0.0090(16) -0.0128(17) 
C22 0.081(4) 0.039(2) 0.049(3) -0.011(2) 0.011(3) -0.003(2) 
C23 0.079(5) 0.060(4) 0.073(4) 0.006(3) -0.013(3) -0.014(3) 
C24 0.103(5) 0.057(3) 0.059(3) 0.000(3) -0.017(3) -0.048(4) 
C25 0.095(5) 0.047(3) 0.063(4) -0.005(3) 0.012(3) -0.023(3) 
C31 0.041(2) 0.0332(19) 0.0319(18) -0.0020(15) 0.0090(16) -0.0128(17) 
O31 0.0318(13) 0.0179(13) 0.0325(16) -0.0037(11) 0.0072(13) -0.0067(10) 
 
_geom_special_details 
; 
 All esds (except the esd in the dihedral angle between two l.s. planes) 
 are estimated using the full covariance matrix.  The cell esds are taken 
 into account individually in the estimation of esds in distances, angles 
 and torsion angles; correlations between esds in cell parameters are only 
 used when they are defined by crystal symmetry.  An approximate (isotropic) 
 treatment of cell esds is used for estimating esds involving l.s. planes. 
; 
 
loop_ 
 _geom_bond_atom_site_label_1 
 _geom_bond_atom_site_label_2 
 _geom_bond_distance 
 _geom_bond_site_symmetry_2 
 _geom_bond_publ_flag 
Mn1 O8 2.120(2) . ? 
Mn1 O8 2.120(2) 2_556 ? 
Mn1 O11 2.169(2) 2_556 ? 
Mn1 O11 2.169(2) . ? 
Mn1 O2 2.2647(19) . ? 
Mn1 O2 2.2647(19) 2_556 ? 
Mn2 O9 2.086(2) . ? 
Mn2 O31 2.12(4) . ? 
Mn2 O21 2.150(3) . ? 
Mn2 O1 2.170(2) 5_666 ? 
Mn2 O12 2.192(2) . ? 
Mn2 O1 2.304(2) . ? 
Mn2 O2 2.385(2) . ? 
O1 C1 1.266(3) . ? 
O1 Mn2 2.170(2) 5_666 ? 
O2 C1 1.262(3) . ? 
O8 C8 1.259(4) . ? 
O9 C8 1.254(4) . ? 
O11 C11 1.260(4) . ? 
O12 C11 1.251(4) . ? 
C1 C2 1.495(4) . ? 
C2 C7 1.384(4) . ? 
C2 C3 1.390(4) . ? 
C3 C4 1.392(4) 8_564 ? 
C3 H3 0.9300 . ? 
C4 C5 1.384(4) . ? 
C4 C3 1.392(4) 8_565 ? 
C4 H4 0.9300 . ? 
C5 C6 1.385(4) . ? 
C5 C8 1.511(4) . ? 
C6 C7 1.395(4) 8_565 ? 
C6 H6 0.9300 . ? 
C7 C6 1.395(4) 8_564 ? 
C7 H7 0.9300 . ? 
C11 C12 1.496(4) . ? 
C12 C13 1.387(4) . ? 
C12 C14 1.389(4) . ? 
C13 C14 1.389(4) 7_556 ? 
C13 H13 0.9300 . ? 
C14 C13 1.389(4) 7_556 ? 
C14 H14 0.9300 . ? 
O21 C21 1.246(5) . ? 
N21 C21 1.322(6) . ? 
N21 C22 1.479(8) . ? 
N21 C24 1.483(7) . ? 
C21 H21 0.9300 . ? 
C22 C23 1.483(9) . ? 
C22 H22A 0.9700 . ? 
C22 H22B 0.9700 . ? 
C23 H23A 0.9600 . ? 
C23 H23B 0.9600 . ? 
C23 H23C 0.9600 . ? 
C24 C25 1.457(9) . ? 
C24 H24A 0.9700 . ? 
C24 H24B 0.9700 . ? 
C25 H25A 0.9600 . ? 
C25 H25B 0.9600 . ? 
C25 H25C 0.9600 . ? 
C31 O31 1.28(6) . ? 
 
loop_ 
 _geom_angle_atom_site_label_1 
 _geom_angle_atom_site_label_2 
 _geom_angle_atom_site_label_3 
 _geom_angle 
 _geom_angle_site_symmetry_1 
 _geom_angle_site_symmetry_3 
 _geom_angle_publ_flag 
O8 Mn1 O8 98.92(13) . 2_556 ? 
O8 Mn1 O11 170.15(9) . 2_556 ? 
O8 Mn1 O11 89.33(9) 2_556 2_556 ? 
O8 Mn1 O11 89.34(9) . . ? 
O8 Mn1 O11 170.15(9) 2_556 . ? 
O11 Mn1 O11 82.99(13) 2_556 . ? 
O8 Mn1 O2 92.45(8) . . ? 
O8 Mn1 O2 91.85(8) 2_556 . ? 
O11 Mn1 O2 92.64(8) 2_556 . ? 
O11 Mn1 O2 82.39(8) . . ? 
O8 Mn1 O2 91.85(8) . 2_556 ? 
O8 Mn1 O2 92.45(8) 2_556 2_556 ? 
O11 Mn1 O2 82.39(8) 2_556 2_556 ? 
O11 Mn1 O2 92.64(8) . 2_556 ? 
O2 Mn1 O2 173.38(12) . 2_556 ? 
O9 Mn2 O31 168.1(10) . . ? 
O9 Mn2 O21 173.08(12) . . ? 
O31 Mn2 O21 11.6(9) . . ? 
O9 Mn2 O1 91.66(9) . 5_666 ? 
O31 Mn2 O1 95.3(12) . 5_666 ? 
O21 Mn2 O1 95.00(12) . 5_666 ? 
O9 Mn2 O12 90.05(11) . . ? 
O31 Mn2 O12 79.2(9) . . ? 
O21 Mn2 O12 90.66(12) . . ? 
O1 Mn2 O12 99.86(9) 5_666 . ? 
O9 Mn2 O1 89.34(9) . . ? 
O31 Mn2 O1 101.6(9) . . ? 
O21 Mn2 O1 90.25(10) . . ? 
O1 Mn2 O1 77.55(8) 5_666 . ? 
O12 Mn2 O1 177.32(9) . . ? 
O9 Mn2 O2 87.48(9) . . ? 
O31 Mn2 O2 94.8(12) . . ? 
O21 Mn2 O2 86.60(11) . . ? 
O1 Mn2 O2 133.04(7) 5_666 . ? 
O12 Mn2 O2 127.08(8) . . ? 
O1 Mn2 O2 55.50(7) . . ? 
C1 O1 Mn2 163.28(18) . 5_666 ? 
C1 O1 Mn2 94.21(16) . . ? 
Mn2 O1 Mn2 102.45(8) 5_666 . ? 
C1 O2 Mn1 152.3(2) . . ? 
C1 O2 Mn2 90.58(16) . . ? 
Mn1 O2 Mn2 98.47(7) . . ? 
C8 O8 Mn1 129.2(2) . . ? 
C8 O9 Mn2 138.2(2) . . ? 
C11 O11 Mn1 155.4(2) . . ? 
C11 O12 Mn2 99.39(19) . . ? 
O1 C1 O2 119.6(2) . . ? 
O1 C1 C2 120.0(2) . . ? 
O2 C1 C2 120.5(2) . . ? 
C7 C2 C3 119.8(3) . . ? 
C7 C2 C1 120.4(2) . . ? 
C3 C2 C1 119.8(3) . . ? 
C2 C3 C4 119.9(3) . 8_564 ? 
C2 C3 H3 120.1 . . ? 
C4 C3 H3 120.1 8_564 . ? 
C5 C4 C3 120.4(3) . 8_565 ? 
C5 C4 H4 119.8 . . ? 
C3 C4 H4 119.8 8_565 . ? 
C4 C5 C6 119.7(3) . . ? 
C4 C5 C8 119.6(3) . . ? 
C6 C5 C8 120.7(3) . . ? 
C5 C6 C7 120.2(3) . 8_565 ? 
C5 C6 H6 119.9 . . ? 
C7 C6 H6 119.9 8_565 . ? 
C2 C7 C6 120.1(3) . 8_564 ? 
C2 C7 H7 120.0 . . ? 
C6 C7 H7 120.0 8_564 . ? 
O9 C8 O8 126.1(3) . . ? 
O9 C8 C5 115.7(3) . . ? 
O8 C8 C5 118.2(3) . . ? 
O12 C11 O11 121.6(3) . . ? 
O12 C11 C12 118.8(3) . . ? 
O11 C11 C12 119.6(3) . . ? 
C13 C12 C14 119.8(2) . . ? 
C13 C12 C11 120.1(3) . . ? 
C14 C12 C11 120.1(3) . . ? 
C12 C13 C14 120.3(3) . 7_556 ? 
C12 C13 H13 119.9 . . ? 
C14 C13 H13 119.9 7_556 . ? 
C13 C14 C12 119.9(3) 7_556 . ? 
C13 C14 H14 120.1 7_556 . ? 
C12 C14 H14 120.1 . . ? 
C21 O21 Mn2 125.7(3) . . ? 
C21 N21 C22 120.4(4) . . ? 
C21 N21 C24 119.2(5) . . ? 
C22 N21 C24 120.1(5) . . ? 
O21 C21 N21 123.7(4) . . ? 
O21 C21 H21 118.2 . . ? 
N21 C21 H21 118.2 . . ? 
N21 C22 C23 115.0(5) . . ? 
N21 C22 H22A 108.5 . . ? 
C23 C22 H22A 108.5 . . ? 
N21 C22 H22B 108.5 . . ? 
C23 C22 H22B 108.5 . . ? 
H22A C22 H22B 107.5 . . ? 
C25 C24 N21 114.5(6) . . ? 
C25 C24 H24A 108.6 . . ? 
N21 C24 H24A 108.6 . . ? 
C25 C24 H24B 108.6 . . ? 
N21 C24 H24B 108.6 . . ? 
H24A C24 H24B 107.6 . . ? 
C31 O31 Mn2 133(3) . . ? 
 
_diffrn_measured_fraction_theta_max    0.792 
_diffrn_reflns_theta_full              38.84 
_diffrn_measured_fraction_theta_full   0.792 
_refine_diff_density_max    1.306 
_refine_diff_density_min   -1.834 
_refine_diff_density_rms    0.226 
